# Supplementary material for: Human iPSC Modeling of Genetic Febrile Seizure Reveals Aberrant Molecular and Physiological Features Underlying an Impaired Neuronal Activity
Source: MDPI journal article supplement (doi:10.3390/biomedicines10051075), 2022-05-05
Supplement: s1 [file s1]

## Supplementary Materials

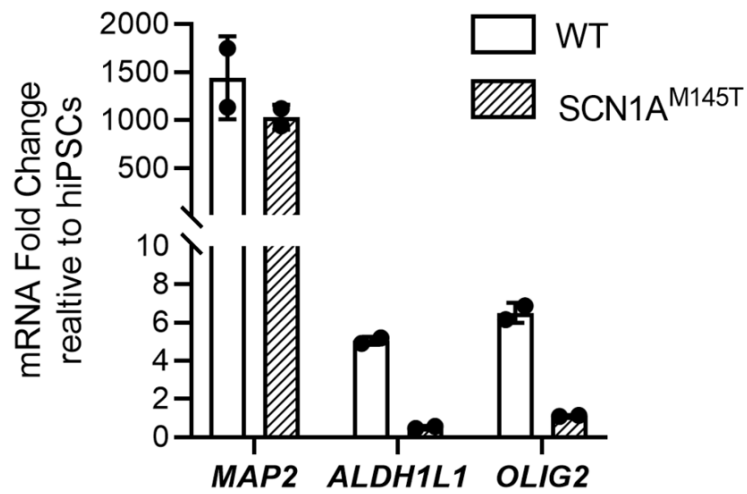

**Figure S1.** Differentiated idNs presented low levels of astrocyte marker *ALDH1L1* and oligodendrocyte marker *OLIG2*, compared to the expression of neuronal marker *MAP2*. *GAPDH* was used as control. Data are presented as mean  $\pm$  SEM of two biological replicates (black dots).

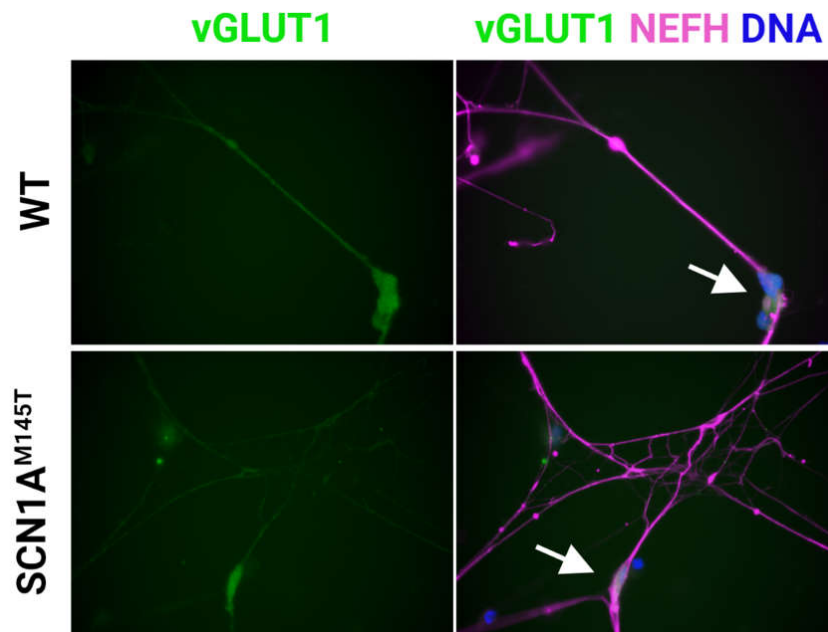

**Figure S2.** Immunofluorescence analysis of vesicular glutamate transporter vGLUT1 expression compared to neuronal marker NEFH in idNs of WT (upper images) and SCN1A<sup>M145T</sup> (lower images) subjects. White arrows indicate idNs positive for vGLUT1.

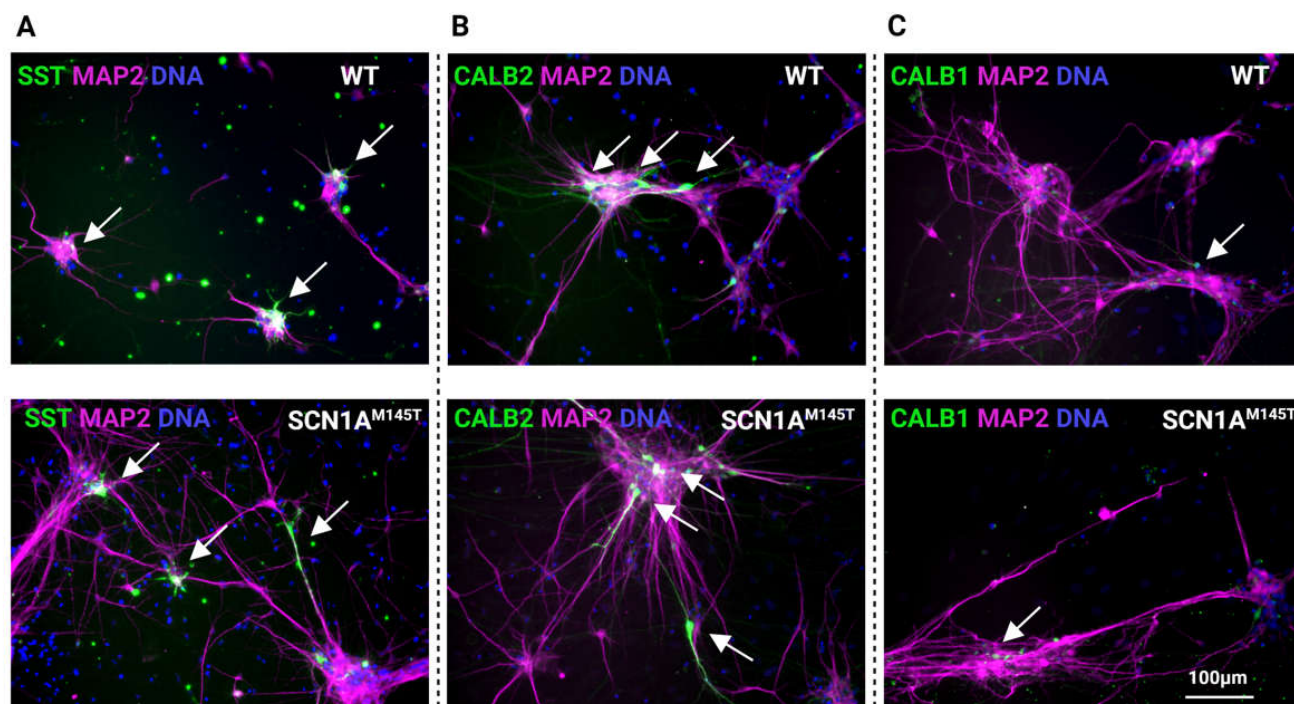

**Figure S3.** Immunofluorescence analysis of idNs showing the interneuronal subtype markers distribution compared to MAP2 expression: (A), somatostatin (SST) (B), calretinin (CALB2), and (C), calbindin (CALB1). Nuclei are stained in blue with DAPI. For each marker tested, WT-idNs are shown in the upper panels, while SCN1A<sup>M145T</sup> idNs are shown in the lower panels. Arrows indicate neurons expressing the specific interneuronal markers.

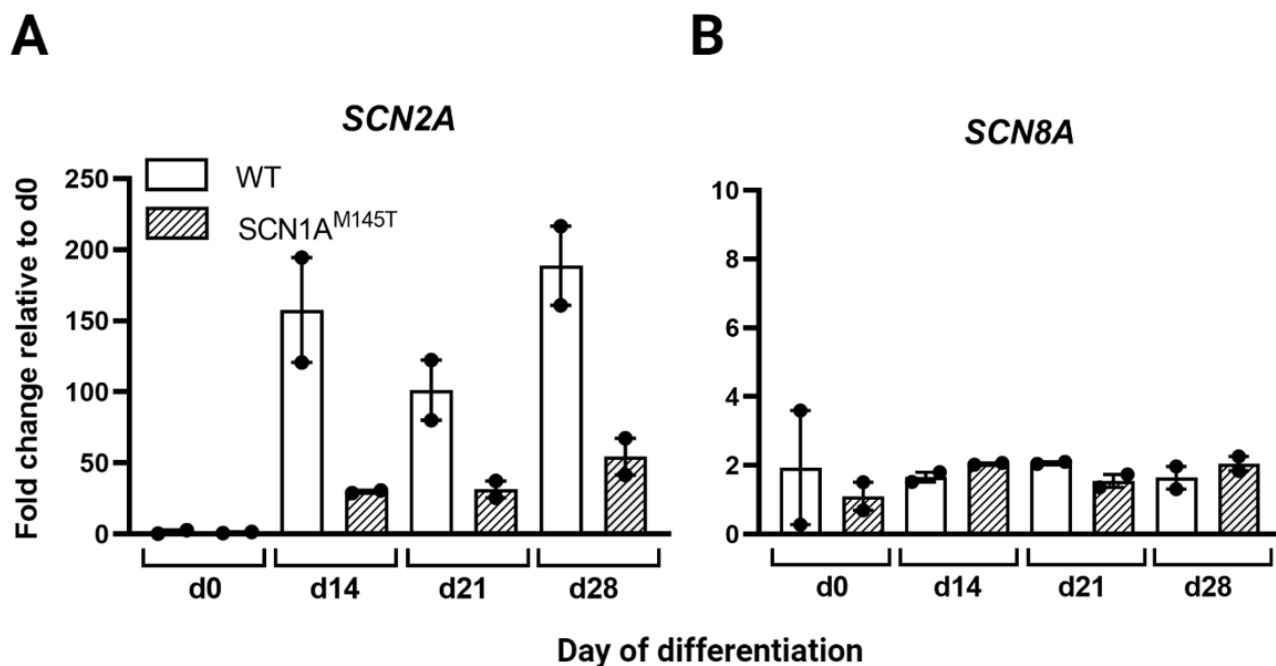

**Figure S4.** Quantitative RT-PCR analysis of CNS VSVGs genes in WT-idNs and SCN1A<sup>M145T</sup>-idNs at day of differentiation 0 (NSCs), d14, d21, and d28. (A), *SCN2A* results expressed in both, control and diseased idNs, but shows a significantly higher expression in the WT cells. (B), *SCN8A*, the adult isoform, is the VSVGs with the lowest expression among both WT and SCN1A<sup>M145T</sup> groups during all time points analyzed. Data are presented as mean±SEM of two biological replicates (black dots).

Table S1. List of primers used in qRT-PCR experiments.

| Gene Name     | Forward Primer         | Reverse Primer                 |
|---------------|------------------------|--------------------------------|
| <i>GAPDH</i>  | TCCTCTGACTTCAACAGCGA   | GGGTCTTACTCCTTGGAGGC           |
| <i>MAP2</i>   | CCACCTGAGATTAAGGATCA   | GGCTTACTTTGCTTCTCTGA           |
| <i>NEFM</i>   | TCCTCAACGTCAAGATGGCT   | GTGTTGGACCTTAAGCTTGGG          |
| <i>NEFL</i>   | AGACCCTGGAAATCGAAGCA   | TCACGTTGAGGAGGTCTTGG           |
| <i>SYP</i>    | CAAGGGGCTGTCAGATGTGA   | CCTGTCTCCTTAAACACGAACC         |
| <i>PSD95</i>  | CGTTCGCCTCTATGTCATGC   | TCCAATCTGCAACCTCCCAT           |
| <i>GAD2</i>   | CTCATTGCCTTCACGTCTGA   | GCTGTCTGTTCCAATCCCTAA          |
| <i>vGLUT2</i> | GACCTACCCAGCATGTCATG   | ACCAGACCATTCCAAAGCTTC          |
| <i>SCN1A</i>  | GTGTGGTTTCCTTGGTTGGT   | GTCCATGGAAACGTGGAAAG           |
| <i>SCN2A</i>  | ATCAGGCCACATTGGAAGAG   | GATGCTACTGAAGAACTCTCTG<br>AAAA |
| <i>SCN3A</i>  | GCCAAACCATGTGCCTTATT   | CCCTTTTGCATTCTTCCTACTG         |
| <i>SCN8A</i>  | GGGGAACCTTCGAAACAAGT   | GCATCAGAACTGTTCCACACA          |
| <i>KCC2</i>   | GCCACGCTTTCGATATTACC   | GCATGGCTACCAGTGCATAA           |
| <i>NKCC1</i>  | TGACTTGAGAGAAGGTGCACAG | TGTTTGGCTTCATACGACCA           |
